# Supplementary material for: How Light Modulates the Growth of Cyanidioschyzon merolae Cells by Changing the Function of Phycobilisomes
Source: MDPI journal article supplement (doi:10.3390/cells12111480), 2023-05-26
Supplement: s1 [file s1]

Supplementary Table S1 Primers used for generation of standard proteins (PsaA, CpcA, and CpcA).

|            |                                                                                   |
|------------|-----------------------------------------------------------------------------------|
| PsaA_xho_f | ATCTCGAGATGACGTTAACAACAGAGAAACAAG                                                 |
| PsaA_xho_r | TGCTCGAGGCTACCGCTTCCACTTCGCTACCTACTGCAATAATTCTTGCTAAGA                            |
| CpcA_nco_f | ATACCATGGGTAAACTCCAATAACTGAAGCAATA                                                |
| CpcA_sal_r | GTGCTCGAGCGCTTTGGCAGCCGCTTCCTTTGCGGCAGCCTCTTAGCCGCTGCTTCGGCGCTTAATGCGTTGATAGCATA  |
| Apc_xho_f  | ATACCATGGGTATTGTTACCAAGTCAATTGTGAAT                                               |
| ApcA_xho_r | GTGCTCGAGCGCTTTGGCAGCCGCTTCCTTTGCGGCAGCCTCTTAGCCGCTGCTTCGGCTTGCAATTGCATTGATAGTGTA |
